1 **Communication**

2  
3 **Rapid inactivation of SARS-CoV-2 variants by continuous and intermittent irradiation**  
4 **with a deep-ultraviolet light-emitting diode (DUV-LED) device**

5  
6  
7 Hiroko Inagaki<sup>1</sup>, Akatsuki Saito<sup>2, 3, 4</sup>, Chiho Kaneko<sup>4</sup>, Hironobu Sugiyama<sup>1, 5</sup>, Tamaki  
8 Okabayashi<sup>2, 3, 4</sup>, Shouichi Fujimoto<sup>6</sup>

- 9  
10 1. M&N Collaboration Research Laboratory, Department of Medical Environment Innovation,  
11 Faculty of Medicine, University of Miyazaki, Japan  
12 2. Department of Veterinary Science, Faculty of Agriculture, University of Miyazaki,  
13 Miyazaki, Japan  
14 3. Graduate School of Medicine and Veterinary Medicine, University of Miyazaki, Miyazaki,  
15 Japan.  
16 4. Center for Animal Disease Control, University of Miyazaki, Miyazaki, Japan  
17 5. Nikkiso Co., Ltd., Tokyo, Japan  
18 6. Department of Hemovascular Medicine and Artificial Organs, Faculty of Medicine,  
19 University of Miyazaki, Japan

20  
21  
22 **Corresponding author:**

23 Shouichi Fujimoto  
24 Department of Hemovascular Medicine and Artificial Organs,  
25 Faculty of Medicine, University of Miyazaki, Japan  
26 5200 Kihara, Kiyotake, Miyazaki 889-1692, Japan  
27 Tel: +81-985-85-9761; Fax: +81-985-85-9761  
28 E-mail: [fujimos@med.miyazaki-u.ac.jp](mailto:fujimos@med.miyazaki-u.ac.jp)

29  
30 **Keywords:**

31 SARS-CoV-2, Variants, UV-LED, Viral inactivation, COVID-19  
32

## 33 **Abstract**

34 More than 1 year has passed since social activities have been restricted due to the spread  
35 of severe acute respiratory syndrome coronavirus 2 (SARS-CoV-2). More recently, novel  
36 SARS-CoV-2 variants have been spreading around the world, and there is growing concern  
37 of higher transmissibility of the variants and weaker protective efficacy of vaccine against the  
38 variants. Immediate measures are needed to reduce human exposure to the virus. In this  
39 study, the antiviral efficacy of deep-ultraviolet light-emitting diode (DUV-LED) irradiation ( $280$   
40  $\pm 5$  nm,  $3.75$  mW/cm<sup>2</sup>) against three SARS-CoV-2 variants was evaluated. For the B.1.1.7,  
41 B.1.351, and P.1 strains, the infectious titer reduction rates of 96.3%, 94.6%, and 91.9%,  
42 respectively, were already recognized with the irradiation of virus stocks for 1 s, and the rates  
43 increased to 99.9%, 99.9%, and 99.8%, respectively, with irradiation for 5 s. We also tested  
44 the effect of pulsed DUV-LED irradiation ( $7.5$  mW/cm<sup>2</sup>, duty rate: 50%, frequency: 1 KHz)  
45 under the same output conditions as continuous irradiation, and found that the antiviral  
46 efficacy of pulsed and continuous irradiation was the same. These findings suggest that  
47 SARS-CoV-2 may be instantly inactivated by DUV-LED irradiation if the DUV-LED device is  
48 further developed and optimized to increase its output.

49

50

## 51 **Introduction**

52 The global severe acute respiratory syndrome coronavirus 2 (SARS-CoV-2) pandemic has  
53 placed countries in a difficult and ever-evolving situation for over a year. More than 140 million  
54 cases of coronavirus disease (COVID-19) and 3.0 million deaths due to COVID-19 have been  
55 reported to the World Health Organization (WHO) as of April 18, 2021 [1]; these numbers  
56 represent increases of more than approximately 30- and 10-fold, respectively, when  
57 compared to the numbers last year. Although vaccinations have begun around the world,  
58 COVID-19 has not yet been completely suppressed. At the end of last year, three variants of  
59 SARS-CoV-2, that is, the United Kingdom (UK) strain (B.1.1.7) [2,3], South African strain  
60 (B.1.351) [4,5], and Brazilian strain (P.1) [6,7], were confirmed, and they have recently spread  
61 all over the world. These variants threaten society as a whole, since the variants may have  
62 higher transmissibility [2,3,8-10], protective efficacy of vaccine on the variants be weak [10-  
63 15] and the patients infected with the variants may be more likely to develop severe medical  
64 conditions [16,17].

65 However, governments worldwide are attempting to balance economic activity and  
66 medical care as much as possible. Although the development of therapeutic agents and  
67 vaccines is an important strategy for bringing an end to the pandemic, it is also necessary to  
68 devise measures to reduce virus exposure to prevent the spread of infection due to droplets

69 and droplet nuclei.

70 A deep-ultraviolet light-emitting diode (DUV-LED) instrument that generates around 250-  
71 to 300-nm wavelengths has been reported to effectively inactivate microorganisms, including  
72 SARS-CoV-2 [18-22]; however, its effect on SARS-CoV-2 variants has not yet been  
73 evaluated. Recently, the inactivating effects of pulse patterns of a UV-LED device, which  
74 enables pulsed irradiation as the radiation can be turned on and off at a high frequency, on  
75 microorganisms have been shown to be as effective as continuous irradiation [23]. In this  
76 study, we examined whether continuous and intermittent (pulsed) DUV-LED irradiation can  
77 inactivate the three types of SARS-CoV-2 variants (B.1.1.7, B.1.351, and P.1).

78

## 79 **Materials and Methods**

### 80 *• Materials*

81 1. Cells: VeroE6/TMPRSS2 cells were obtained from the Japanese Collection of Research  
82 Bioresources (JCRB) Cell Bank in Japan (<https://cellbank.nibiohn.go.jp/english/>; JCRB no.  
83 JCRB1819). The cells were cultured in Dulbecco's Modified Eagle Medium (DMEM) containing  
84 10% fetal bovine serum (FBS), penicillin/streptomycin, and 1 mg/ml G418 (Thermo Fisher  
85 Scientific, Tokyo).

86 2. Viral stocks: Three types of SARS-CoV-2 variants, that is, the variants that were first  
87 described in the UK (hCoV-19/Japan/QHN001/2020 (B.1.1.7)), South Africa (hCoV-  
88 19/Japan/TY8-612/2021 (B.1.351),) and Brazil (hCoV-19/Japan/TY7-501/2020 (P.1)), were  
89 obtained from the National Institute of Infectious Diseases of Japan. These viruses were  
90 propagated in VeroE6/TMPRSS2 cells cultured in DMEM containing 10% FBS and  
91 penicillin/streptomycin. At 48 h or 72 h after infection, virus stocks were collected by centrifuging  
92 the culture supernatants at 3,000 rpm for 10 min. Clarified supernatants were kept at -80°C until  
93 use.

94 3. DUV-LED: The DUV-LED apparatus, which generates a narrow-range wavelength (280  
95 ± 5 nm), was obtained from Nikkiso Co. Ltd. (Tokyo, Japan). This wavelength was selected with  
96 consideration for practicality due to the high output (radiation) power and longer durability of the  
97 LED device during the developmental stage. In addition to conventional continuous irradiation,  
98 this DUV-LED instrument enables pulsed irradiation as the radiation can be turned on and off at  
99 a high frequency. We used a signal generator (AIMEX Corporation, Tokyo, Japan) to irradiate  
100 DUV-LED light.

101 For the evaluation of DUV-LED inactivation of the target virus, aliquots of virus stock (150 µl)  
102 adjusted to  $5.0 \times 10^4$  PFU/ml were placed in the center of a 60-mm Petri dish and irradiated with  
103  $3.75 \text{ mW/cm}^2$  of continuous irradiation or with  $7.5 \text{ mW/cm}^2$  of pulsed irradiation (duty rate: 50%;  
104 frequency: 1 KHz) at a work distance of 20 mm for various times (1, 5, or 10 s; n = 3 each). We

105 set the duty rate and frequency of the pulsed irradiation to be the same as the output per time of  
106 the continuous irradiation (Supplement 1).

107

108

109 • *Method*

110 The antiviral efficacy of DUV-LED irradiation against the SARS-CoV-2 variants was evaluated.  
111 After DUV-LED irradiation, approximately 120  $\mu$ l of each virus stock was collected with a 200- $\mu$ l  
112 tip. Virus solutions were serially diluted in 10-fold steps in serum-free DMEM in a 1.5-ml tube,  
113 then inoculated onto VeroE6/TMPRSS2 monolayers in a 12-well plate. After adsorption of virus  
114 for 2 h, cells were overlaid with MEM containing 1% carboxymethyl cellulose and 2% FBS (final  
115 concentration). The cells were incubated for 72 h in a CO<sub>2</sub> incubator, then observed under a  
116 microscope for cytopathic effects. A non-irradiated virus suspension was used as a negative  
117 control. To calculate the PFU, cells were fixed with 10% formalin for 30 min, and stained with a  
118 2% crystal violet solution.

119 The antiviral effects of DUV-LED irradiation were assessed using the logPFU ratio calculated as  
120  $\log_{10}(N_t / N_0)$ , where  $N_t$  is the PFU count of the UV-irradiated sample, and  $N_0$  is the PFU count  
121 of the sample without UV irradiation. In addition, the infectious titer reduction rate was calculated  
122 as  $(1 - 1 / 10^{\log \text{PFU ratio}}) \times 100$  (%). All experiments were performed in a biosafety level 3  
123 laboratory.

124

125

## 126 **Results**

127 • *Inactivating effects of continuous irradiation with a DUV-LED device*

128 We observed a marked cytopathic effect in all cells that were infected with the UK, South African,  
129 or Brazilian strain and were not irradiated with DUV-LED light (Figure 1a). The infected cells that  
130 were irradiated for 1 s showed an obvious reduction in the cytopathic effect (Figure 1b), and the  
131 morphology of the cells that were irradiated for 5 s was largely comparable to that of the mock  
132 cells (Figure 1c, d).

133 The plaque assay revealed that a short irradiation time inactivated SARS-CoV-2 variants  
134 rapidly (Figure 2). Of note, for the UK, South African, and Brazilian strains, the infectious titer  
135 reduction rates of 96.3%, 94.6%, and 91.9%, respectively, were already recognized with the  
136 irradiation of virus stocks for 1 s, and the rates increased to 99.9%, 99.9%, and 99.8%,  
137 respectively, with irradiation for 5 s (Table 1 and Figure 3). These results suggested that DUV-  
138 LED irradiation for a very short time can drastically inactivate SARS-CoV-2 variants.

139

140 • *Inactivating effects of pulsed irradiation with a DUV-LED device*

141 For the UK, South African, and Brazilian strains, the infectious titer reduction rates of 94.4%,  
142 93.4%, and 84.4%, respectively, were already recognized with the irradiation of virus stocks for 1  
143 s, and the rates increased to 99.9%, 99.9%, and 99.8%, respectively, with irradiation for 5 s (Table  
144 1 and Figure 4). These results were almost the same as those obtained with continuous irradiation.

145  
146

## 147 **Discussion**

148 Recently, there has been growing concern around the world, including at the WHO, regarding  
149 the emergence of new SARS-CoV-2 variants since they may have longer infectivity periods [24],  
150 stronger infectivity, including in children [2,8,10,25,26], and protective efficacy of vaccine on these  
151 variants may be weak [12-15]. It has also been pointed out that patients infected with SARS-CoV-  
152 2 variants may be more likely to develop severe medical conditions and have a higher risk of  
153 death [8,10,16]. Therefore, in parallel with advances in vaccines and therapeutic agents,  
154 measures to reduce virus exposure to prevent the spread of SARS-CoV-2 infection are desired.

155 The present study demonstrated for the first time that DUV-LED irradiation can rapidly  
156 inactivate three types of SARS-CoV-2 variants, that is, the ones that were first described in the  
157 UK, South Africa, and Brazil [2-7,9,10,26]. Additionally, continuous and pulsed DUV-LED  
158 irradiation showed similar degrees of rapid virus inactivation.

159 UV-LED devices that can provide irradiation at various peak emission wavelengths, such as  
160 UV-A (320 – 400 nm), UV-B (280 – 320 nm), and UV-C (100 – 280 nm), have been adopted to  
161 inactivate various pathogenic species, including bacteria, viruses, and fungi. UV-C is considered  
162 to be the most effective germicidal region of the UV spectrum as it causes the formation of  
163 photoproducts in DNA and RNA [27]. These pyrimidine dimers interrupt the transcription,  
164 translation, and replication of DNA and RNA, and eventually lead to the death of the  
165 microorganism [28]. Last year, we reported for the first time that irradiation with DUV-LED at a  
166 wavelength of  $280 \pm 5$  nm rapidly inactivated wild-type SARS-CoV-2 that was obtained from a  
167 COVID-19 patient [22]. The effect of DUV-LED irradiation on the wild-type SARS-CoV-2  
168 (infectious titer reduction rates of 87.4% for 1 s and 99.9% for 10 s of irradiation) was similar to  
169 that on the SARS-CoV-2 variants in the present study. Since the SARS-CoV-2 variants also have  
170 a lipophilic outer membrane (envelope protein), the inactivating effects of DUV-LED irradiation on  
171 the UK, South African, and Brazilian variants were as expected, and similar effects are also  
172 expected for other variants that may emerge in the future. Unlike enveloped viruses, non-  
173 enveloped viruses that do not have the envelope protein, such as norovirus, are known to be  
174 highly resistant to disinfectants, but DUV-LED irradiation is expected to be effective against non-  
175 enveloped viruses as well (unpublished observations).

176 In this study, we also tested the effect of pulsed irradiation with a DUV-LED device. As shown

177 in Table 1 and Figure 4, the degree of virus inactivation by continuous and intermittent irradiation  
178 was comparable when the device outputs were the same (power X radiation time). This suggested  
179 that SARS-CoV-2 may be instantly inactivated by DUV-LED irradiation if the DUV-LED device is  
180 further developed and optimized to increase its output [23].

181 Despite the significant inactivating effects of DUV-LED reported here, this study has some  
182 limitations. First, these effects may be limited to the test conditions applied in this study, including  
183 the irradiation distance and output (work distance of 20 mm; irradiation at 3.75 mW/cm<sup>2</sup> for  
184 continuous irradiation and 7.5 mW/cm<sup>2</sup> for pulsed irradiation (duty rate: 50%; frequency: 1 KHz)).  
185 In addition, it is necessary to also evaluate multiple parameters, such as the frequency and duty  
186 ratio, to clarify the effectiveness of pulse irradiation. The influence of the material and the power  
187 consumption for the high amplitude were also not evaluated. In the future, we will examine in  
188 more detail whether various conditions of DUV-LED irradiation may affect the degree of the  
189 inactivation of microorganisms.

190 In addition to community settings, healthcare settings are also vulnerable to the invasion and  
191 spread of SARS-CoV-2 and its variants, and the stability of SARS-CoV-2 in aerosols and on  
192 surfaces [19] likely contributes to the transmission of the virus in medical environments. It is  
193 important to create an environment that minimizes virus exposure to suppress the spread of  
194 SARS-CoV-2 in a sustainable and efficient manner. It was confirmed in our study that SARS-  
195 CoV-2, including its variants, is highly susceptible to DUV-LED irradiation. By devising appropriate  
196 and optimized irradiation methods, it is conceivable that DUV-LED irradiation can be adapted and  
197 applied in various settings. This study provides useful baseline data for securing a safer  
198 community and medical environment. The development of devices equipped with DUV-LED is  
199 expected to prevent virus spread through the air and from contaminated surfaces.

200

201

202

### 203 **Contributors**

204 H.I., H.S. and A.S. conceived the study and wrote the manuscript. A.S., C.K., and T.O.  
205 conducted the experiments dealing with the viruses. S.F. contributed to the study design,  
206 study supervision, and manuscript revision.

207

### 208 **Acknowledgements**

209 We wish to thank the National Institute of Infectious Diseases, Japan, for providing the hCoV-  
210 19/Japan/TY7-501/2020, hCoV-19/Japan/TY8-612/2021, and hCoV-  
211 19/Japan/QHN001/2020 strains. This study was supported in part by the Japan Agency for  
212 Medical Research and Development Research Program on Emerging and Re-emerging

213 Infectious Diseases (20fk0108163 and 20fk0108518 to A.S.); Japan Agency for Medical  
214 Research and Development Japan Program for Infectious Diseases Research and  
215 Infrastructure (20wm0325009 to A.S.); Japan Society for the Promotion of Science (JSPS)  
216 KAKENHI Grant-in-Aid for Scientific Research (B) (21H02361 to T.O. and A.S.); JSPS  
217 KAKENHI Grant-in-Aid for Scientific Research (C) (19K06382 to A.S.); and JSPS KAKENHI  
218 Grant-in-Aid for Early-Career Scientists (19K15984 to C.K.) ; the Grant for Joint Research  
219 Project of the Research Institute for Microbial Diseases, Osaka University (to T.O. and A.S.).  
220

#### 221 **Declaration of interest statement**

222 H.S. receives part of his salary from Nikkiso Co., Ltd., Tokyo, Japan. Nikkiso Co., Ltd.  
223 supplied the deep-ultraviolet light-emitting diode instrument for evaluation. Nikkiso Co., Ltd.  
224 had no role in the study design, data collection and analysis, decision to publish, or  
225 preparation of the manuscript. The other authors declare no conflicts of interest.  
226

#### 227 **Figure legends**

228 **Figure 1.** Inhibitory effects of continuous DUV-LED irradiation on three types of SARS-CoV-  
229 2 variants (the UK, South African, and Brazilian strains). Cytopathic changes in virus-infected  
230 VeroE6/TMPRSS2 cells without DUV-LED irradiation (a), with DUV-LED irradiation for 1 s (b)  
231 or 5 s (c) corresponding to 3.75 or 18.75 mJ/cm<sup>2</sup>, respectively. (d) Mock cells.  
232

233 **Figure 2.** Plaque formation in VeroE6/TMPRSS2 cells. Virus solutions were treated with  
234 continuous DUV-LED irradiation for 0, 1, or 5 s, then diluted 100-fold and inoculated onto  
235 VeroE6/TMPRSS2 cells. Representative results are shown.  
236

237 **Figure 3.** Log reduction of the infectious titer by continuous irradiation with DUV-LED for the  
238 UK, South African, and Brazilian strains.

239 DUV-LED: continuous irradiation (current: 0.35 A).

240 Time-dependent inactivation of SARS-CoV-2 by DUV-LED irradiation. The results shown are  
241 the means and standard deviations of triplicate measurements.  
242

243 **Figure 4.** Relative value (percentage of the value of the cells irradiated for 0 s) of the  
244 infectious titer after continuous and pulsed irradiation with DUV-LED for the UK, South African,  
245 and Brazilian strains.

246 DUV-LED: continuous irradiation (current: 0.35 A) or pulsed irradiation (current: 0.7 A; duty  
247 ratio: 50%; frequency: 1 KHz). The inactivating effects were almost the same between the  
248 continuous and pulsed DUV-LED irradiation.

249

250 **Table caption**

251 **Table 1.** Differences in the infectious titer after continuous and pulsed DUV-LED irradiation  
252 for the UK, South African, and Brazilian strains irradiated with different patterns of DUV-LED  
253 light for 0, 1, 5, or 10 s.

254

255 **Supplement caption**

256 **Supplement 1.** Output diagrams of two patterns of DUV-LED irradiation. A) Continuous  
257 irradiation with a current of 0.35 A for 1, 5, or 10 s. B) Intermittent (pulsed) irradiation with a  
258 current of 0.7 A for 1, 5, or 10 s (frequency: 1 KHz; duty rate: 50%). The output per time was  
259 set to be the same in continuous irradiation (A, 3.75 mW/cm<sup>2</sup> × time) and intermittent  
260 irradiation (B, 7.5 mW/cm<sup>2</sup> × time).

261

262

263 **References**

- 264 1. [https://www.who.int/docs/default-source/coronaviruse/situation-](https://www.who.int/docs/default-source/coronaviruse/situation-reports/20210420-weekly-epi-update-36.pdf?sfvrsn=ab75add5_7)  
265 [reports/20210420-weekly-epi-update-36.pdf?sfvrsn=ab75add5\\_7](https://www.who.int/docs/default-source/coronaviruse/situation-reports/20210420-weekly-epi-update-36.pdf?sfvrsn=ab75add5_7)
- 266 2. Wise, J. Covid-19: New coronavirus variant is identified in UK. *BMJ* 2020, 371, m4857.
- 267 3. Volz, E.; Mishra, S.; Chand, M.; Barrett, J.C.; Johnson, R.; Geidelberg, L.; Hinsley, W.R.;  
268 Laydon, D.J.; Dabrera, G.; O'Toole, Á.; et al. Assessing transmissibility of SARS-CoV-2  
269 lineage B.1.1.7 in England. *Nature*, Published online on 25 March 2021. doi:  
270 10.1038/s41586-021-03470-x.
- 271 4. <https://sacoronavirus.co.za/2020/12/18/new-covid-19-variant-identified-in-sa/>
- 272 5. Tegally, H.; Wilkinson, E.; Giovanetti, M.; Iranzadeh, A.; Fonseca, V.; Giandhari, J.;  
273 Doolabh, D.; Pillay, S.; Emmanuel James San, E.J.; Msomi, N.; et al. Emergence and  
274 rapid spread of a new severe acute respiratory syndrome-related coronavirus 2 (SARS-  
275 CoV-2) lineage with multiple spike mutations in South Africa. *MedRxiv* 2020 Dec 22. doi:  
276 [10.1101/2020.12.21.20248640](https://doi.org/10.1101/2020.12.21.20248640) (preprint).
- 277 6. [https://virological.org/t/spike-e484k-mutation-in-the-first-sars-cov-2-reinfection-case-](https://virological.org/t/spike-e484k-mutation-in-the-first-sars-cov-2-reinfection-case-confirmed-in-brazil-2020/584)  
278 [confirmed-in-brazil-2020/584](https://virological.org/t/spike-e484k-mutation-in-the-first-sars-cov-2-reinfection-case-confirmed-in-brazil-2020/584)
- 279 7. Faria, N.R.; Mellan, T.A.; Whittaker, C.; Claro, I.M.; Candido, D.S.; Mishra, S.; Crispim,  
280 M.A.E.; Sales, F.C.; Hawryluk, I.; McCrone, J.T.; et al. Genomics and epidemiology of a  
281 novel SARS-CoV-2 lineage in Manaus, Brazil. *medRxiv* 2021 Mar 3. doi:  
282 10.1101/2021.02.26.21252554 (preprint).
- 283 8. Davies, N.G.; Abbott, S.; Barnard, R.C.; Jarvis, C.I.; Kucharski, A.J.; Munday, J.D.;  
284 Pearson, C.A.B.; Timothy W. Russell, T.W.; Tully, D.C.; Washburne, A.D.; et al. Estimated



- 285 transmissibility and impact of SARS-CoV-2 lineage B.1.1.7 in England. *Science* 2021,  
286 372, eabg3055.
- 287 9. Leung, K.; Shum, M.H.H.; Leung, G.M.; Lam, T.T.Y.; Joseph T Wu, J.T. Early  
288 transmissibility assessment of the N501Y mutant strains of SARS-CoV-2 in the United  
289 Kingdom, October to November 2020. *Euro Surveill* 2021, 26, 2002106.
- 290 10. Plante, J.A.; Mitchell, B.M.; Plante, K.S.; Debbink, K.; Weaver, S.C.; Menachery, V.D.  
291 The variant gambit: COVID-19's next move. *Cell Host & Microbe* 2021, 29, 508-515.
- 292 11. Madhi, S.A.; Baillie, V.; Cutland, C.L.; Voysey, M.; Koen, A.L.; Fairlie, L.; Padayachee,  
293 S.D.; Dheda, K.; Barnabas, S.L.; Bhorat, Q.E.; et al. Efficacy of the ChAdOx1 nCoV-19  
294 Covid-19 Vaccine against the B.1.351 Variant. *N Engl J Med*, Published online on 16  
295 March 2021. doi: 10.1056/NEJMoa2102214.
- 296 12. Liu, Z.; VanBlargan, L.A.; Bloyet, L-M.; Rothlauf, P.W.; Chen, R.E.; Stumpf, S.; Zhao, H.;  
297 Errico, J.M.; Theel, E.S.; Liebeskind, M.J.; et al. Identification of SARS-CoV-2 spike  
298 mutations that attenuate monoclonal and serum antibody neutralization. *Cell Host &  
299 Microbe* 2021, 29, 477–488.
- 300 13. Wang, P.; Ryan G. Casner, R.G.; Nair, M.S.; Wang, M.; Jian Yu, J.; Cerutti, G.; Liu, L.;  
301 Kwong, P.D.; Huang, Y.; Shapiro, L.; et al. Increased resistance of SARS-CoV-2 variant  
302 P.1 to antibody neutralization. *Cell Host & Microbe*, Published on 17 April 2021.  
303 doi:10.1016/j.chom.2021.04.007
- 304 14. Weisblum, Y.; Schmidt, F.; Zhang, F.; DaSilva<sup>1</sup>, J.; Poston<sup>1</sup>, D.; Julio CC Lorenzi, J.C.C.;  
305 Muecksch, F.; Rutkowska, M.; Hoffmann, H-H.; Michailidis, E. Escape from neutralizing  
306 antibodies by SARS-CoV-2 spike protein variants. *eLife* 2020, 9, e61312.
- 307 15. Hacısuleyman, E.; Hale, C.; Saito, Y.; Blachere, N.E.; Bergh, M.; Conlon, E.G.; Schaefer  
308 -Babajew, D.J.; et al. Vaccine Breakthrough Infections with SARS-CoV-2 Variants. *N Engl  
309 J Med*, Published online on April 21 2021. doi: 10.1056/NEJMoa2105000.
- 310 16. Davies, N.G.; Jarvis, C.I.; CMMID COVID-19 Working Group, Edmunds<sup>1</sup>, W.J.; Jewell,  
311 N.P.; Diaz-Ordaz, K.; Ruth H. Keogh, R.H. Increased mortality in community-tested cases  
312 of SARS-CoV-2 lineage B.1.1.7. *Nature*, Published online on 15 March 2021,  
313 doi.org/10.1038/s41586-021-03426-1.
- 314 17. Challen, R.; Brooks-Pollock, E.; Read, J.M.; Dyson, L.; Tsaneva-Atanasova, K.; Danon,  
315 L. Risk of mortality in patients infected with SARS-CoV-2 variant of concern 202012/1:  
316 matched cohort study, *BMJ* 2021, 372, n579.
- 317 18. Rattanakul, S.; Oguma, K. Inactivation kinetics and efficiencies of UV-LEDs against  
318 *Pseudomonas aeruginosa*, *Legionella pneumophila*, and surrogate microorganisms.  
319 *Water Res.* 2018, 130, 31–37.
- 320 19. Nishisaka-Nonaka, R.; Mawatari, K.; Tomomi Yamamoto, T.; Kojima, M.; Shimohata, T.;

- 321 Uebanso, T.; Nakahashi, M.; Emoto, T.; Akutagawa, M.; Kinouchi, Y.; et al. Irradiation by  
322 ultraviolet light-emitting diodes inactivates influenza A viruses by inhibiting replication and  
323 transcription of viral RNA in host cells. *J Photochem Photobiol B*. 2018, 189, 193-200.
- 324 20. Kim, D.K.; Kang, D.H. UVC LED irradiation effectively inactivates aerosolized viruses,  
325 bacteria, and fungi in a chamber-type air disinfection system. *Appl Environ Microbiol*.  
326 2018, 84, e00944-18.
- 327 21. Cheng, Y.; Hanyu Chen, H.; Basurto, L.A.S.; Protasenko, V.V.; Bharadwaj, S.; Islam, M.;  
328 Moraru, C.I. Inactivation of *Listeria* and *E. coli* by Deep-UV LED: effect of substrate  
329 conditions on inactivation kinetics. *Sci Rep*. 2020, 10, 3411.
- 330 22. Inagaki, H.; Saito, A.; Sugiyama, H.; Okabayashi, T.; Fujimoto, S. Rapid inactivation of  
331 SARS-CoV-2 with deep-UV LED irradiation. *Emerg. Microbes & Infect*. 2020, 9, 1744-7.
- 332 23. Song, K.; Taghipour, F.; Mohseni, M. Microorganisms inactivation by continuous and  
333 pulsed irradiation of ultraviolet light-emitting diodes (UV-LEDs). *Chem Eng J*. 2018, 343,  
334 362–370.
- 335 24. Kissler, S.M.; Joseph R. Fauver, J.R.; Mack, C.; Caroline G. Tai, Breban, M.I.; Watkins,  
336 A.E.; Radhika M. Samant, R.M.; Anderson, D.J.; Ho, D.D.; Grubaugh, N.D.; et al. Densely  
337 sampled viral trajectories suggest longer duration of acute infection with B. 1.1. 7 variant  
338 relative to non-B. 1.1. 7 SARS-CoV-2. *medRxiv* 2021 February 19, doi:  
339 <https://doi.org/10.1101/2021.02.16.21251535> (preprint).
- 340 25. Korber, B.; Will M. Fischer, W.M.; Gnanakaran, S.; Yoon, H.; Theiler, J.; Abfalterer, W.;  
341 Hengartner, N.; Giorgi, E.E.; Bhattacharya, T.; Foley, B.; et al. Tracking Changes in  
342 SARS-CoV-2 Spike: Evidence that D614G Increases Infectivity of the COVID-19 Virus.  
343 *Cell* 2020, 182, 812–827.
- 344 26. European Centre for Disease Prevention and Control. Risk Assessment: Risk related to  
345 spread of new SARS-CoV-2 variants of concern in the EU/EEA. December 29, 2020.  
346 [https://www.ecdc.europa.eu/en/publications-data/covid-19-risk-assessment-spread-](https://www.ecdc.europa.eu/en/publications-data/covid-19-risk-assessment-spread-new-sars-cov-2-variants-eueea)  
347 [new-sars-cov-2-variants-eueea](https://www.ecdc.europa.eu/en/publications-data/covid-19-risk-assessment-spread-new-sars-cov-2-variants-eueea).
- 348 27. Bintsis, T.; Litopoulou-Tzanetaki, E.; Robinson, R.K. Existing and potential applications  
349 of ultraviolet light in the food industry – a critical review. *J Sci Food Agric*. 2000, 80, 637-  
350 645.
- 351 28. Kim, S.J.; Kim, D.K.; Kang, D.H. Using UVC light-emitting diodes at wavelengths of 266  
352 to 279 nanometers to inactivate foodborne pathogens and pasteurize sliced cheese. *Appl*  
353 *Environ Microbiol*. 2016, 82, 11-17.

**Figure 1**

UK strain

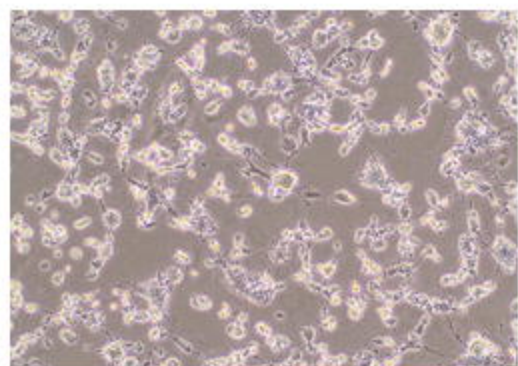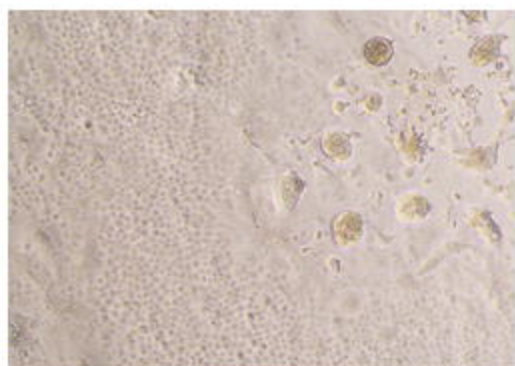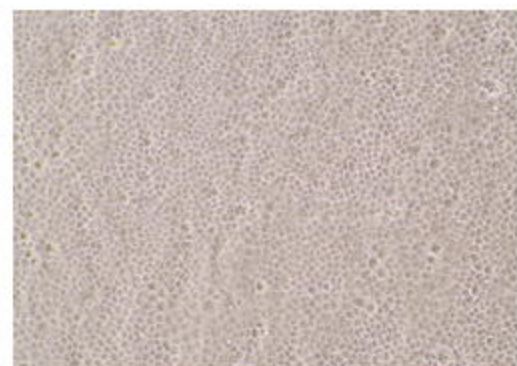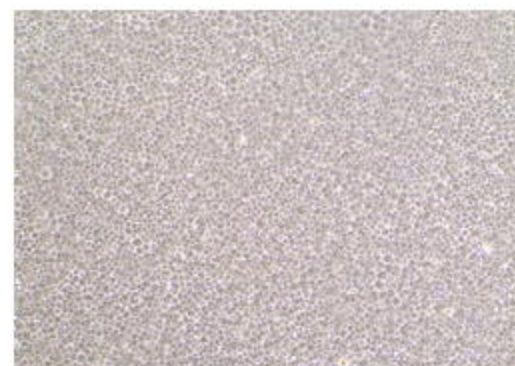

South African strain

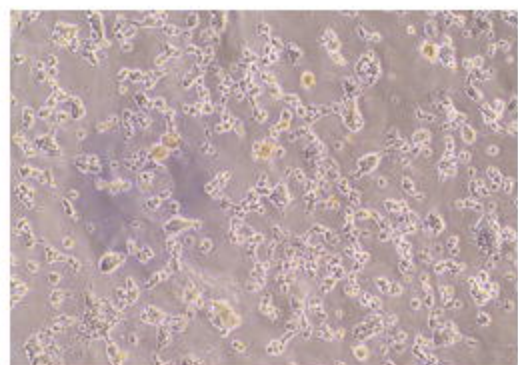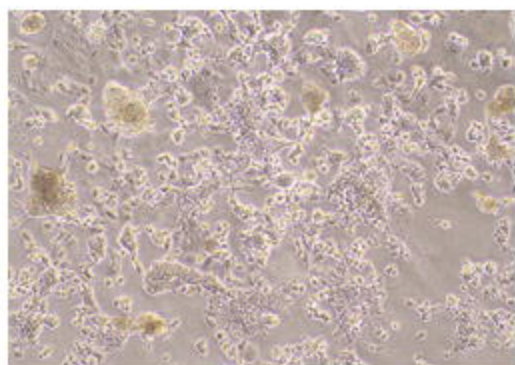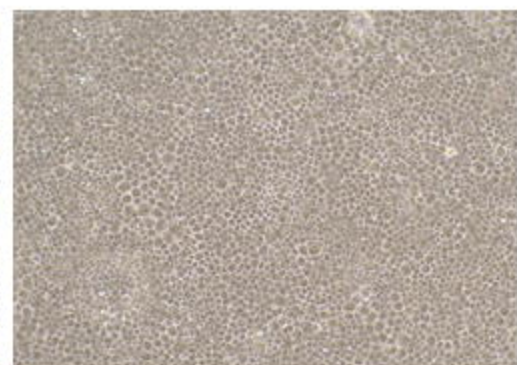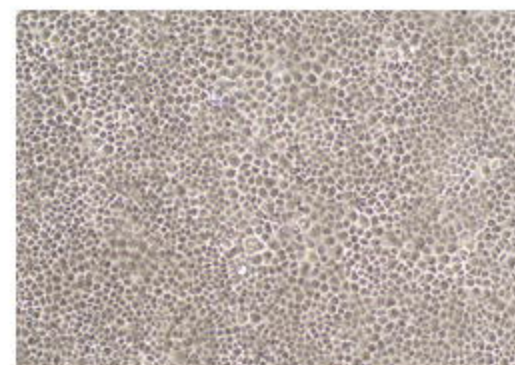

Brazilian strain

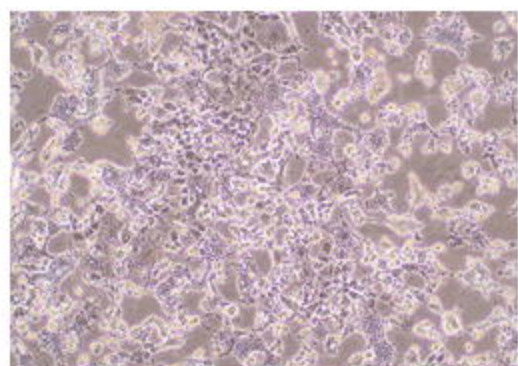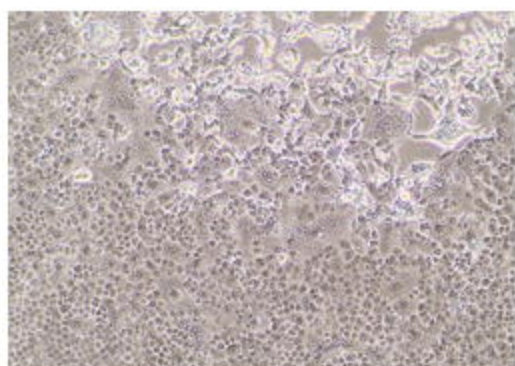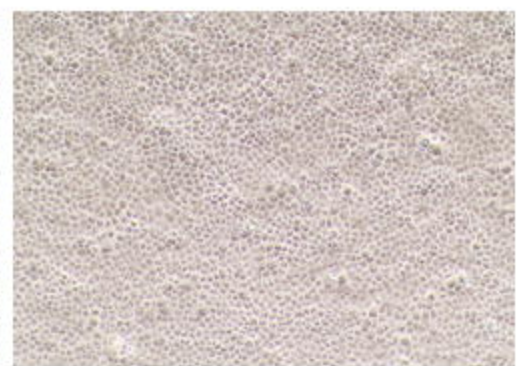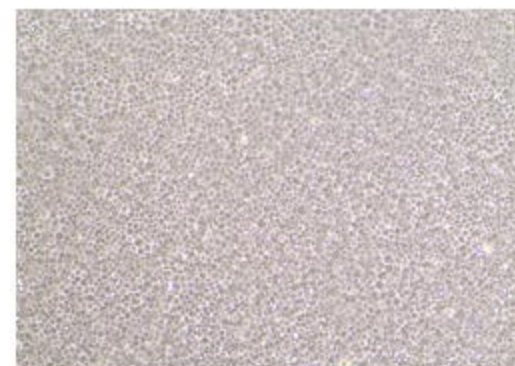

(a) 0 sec

(b) 1 sec

(c) 5 sec

(d) Mock

**Figure 2**

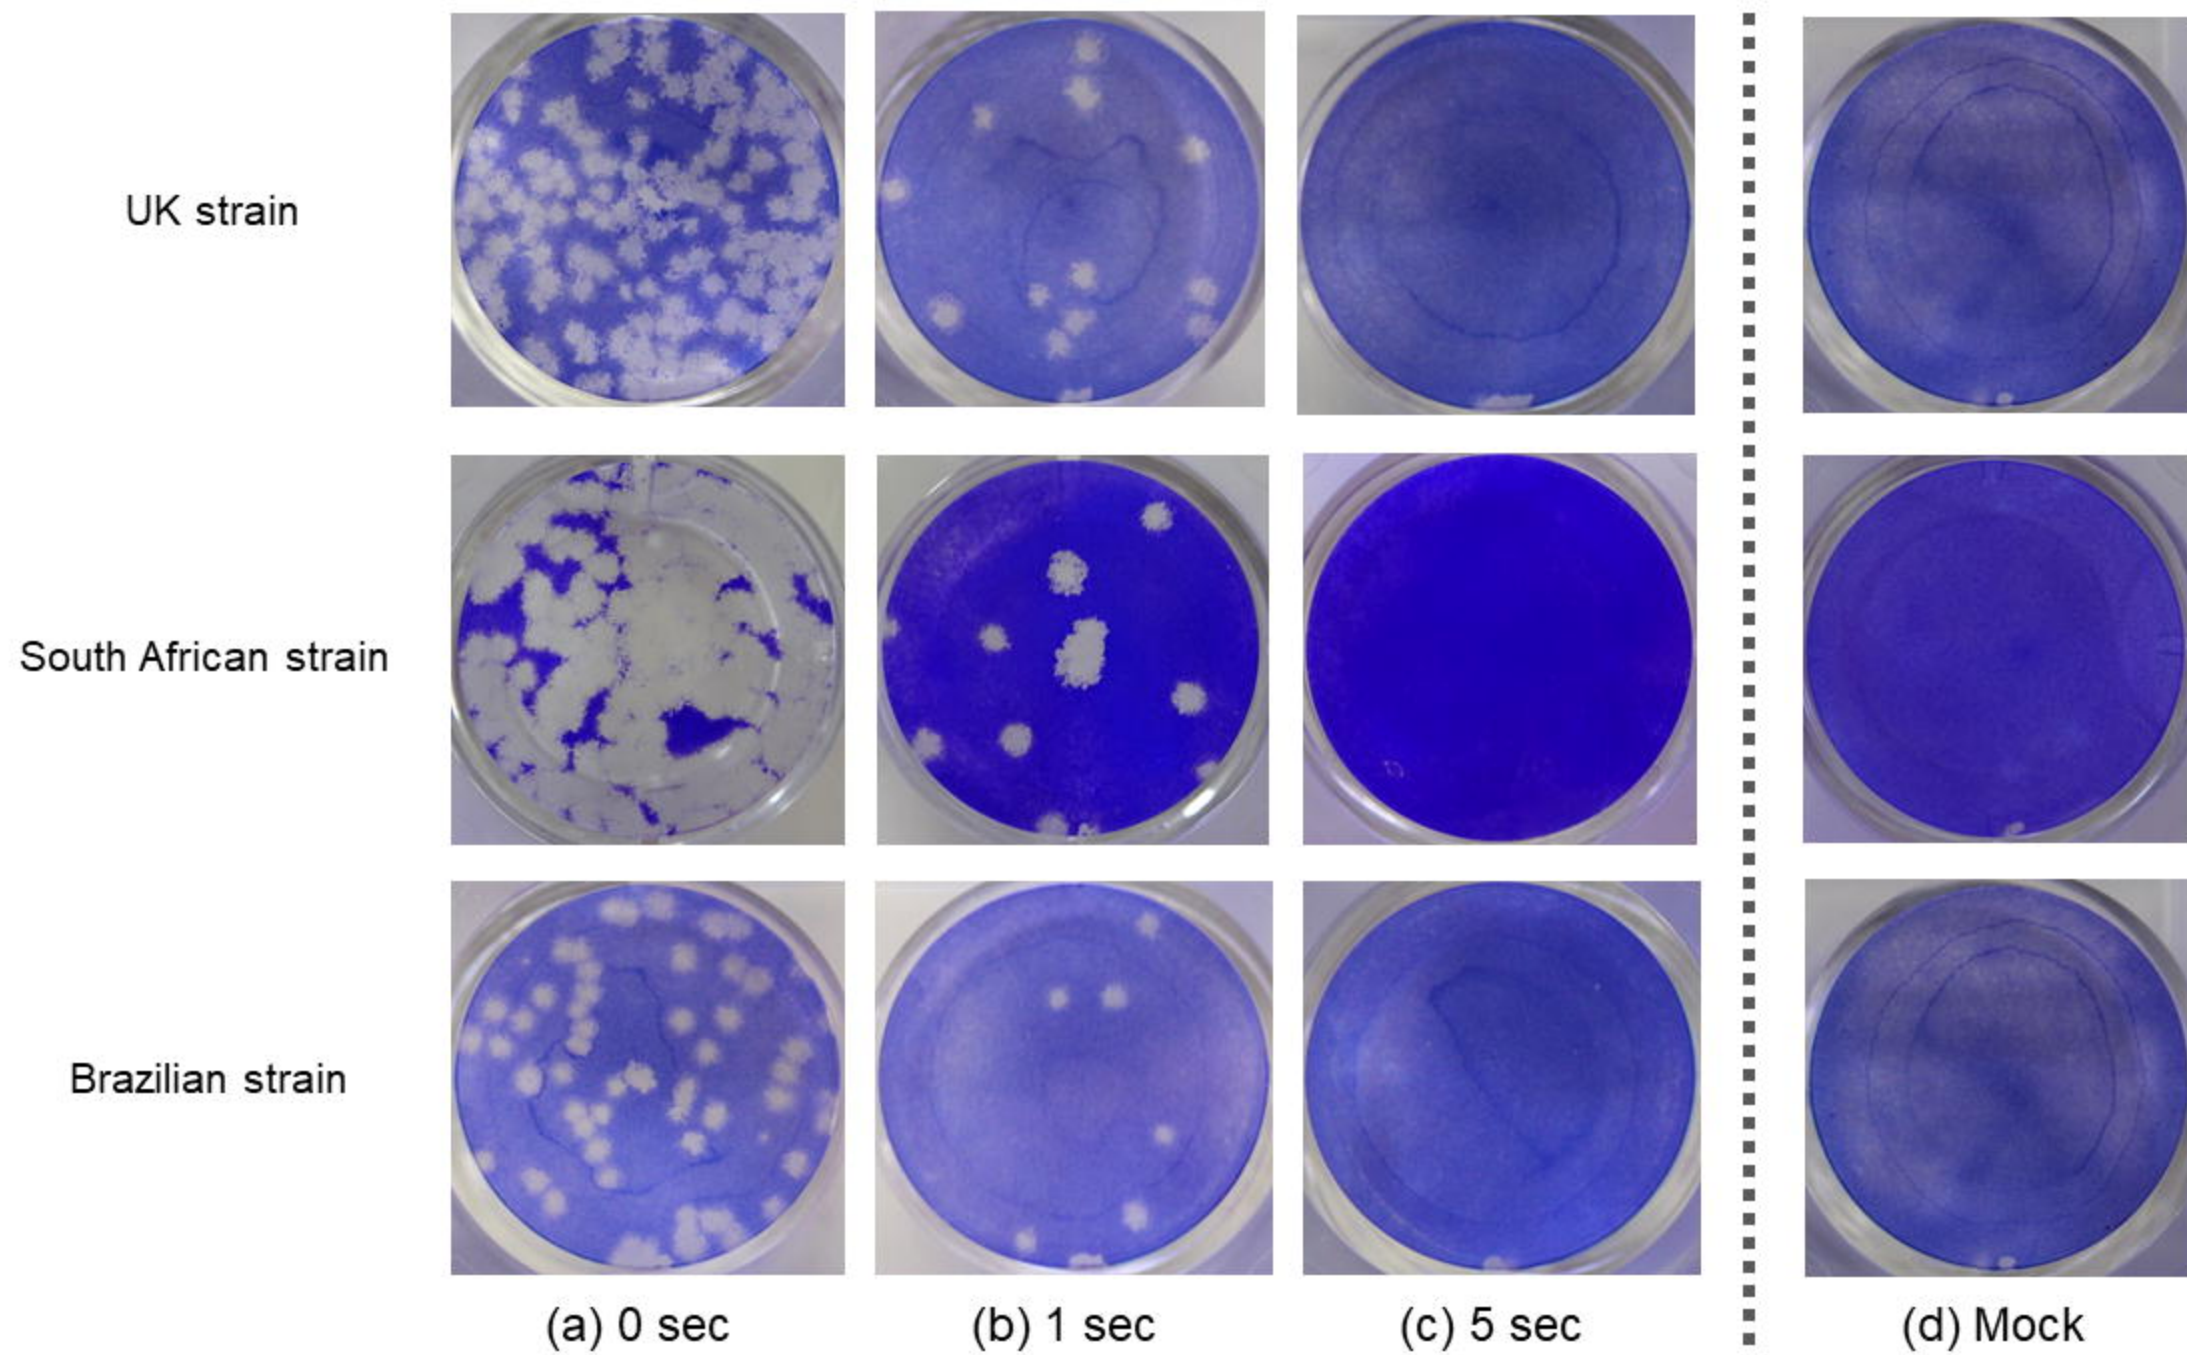

Figure 3

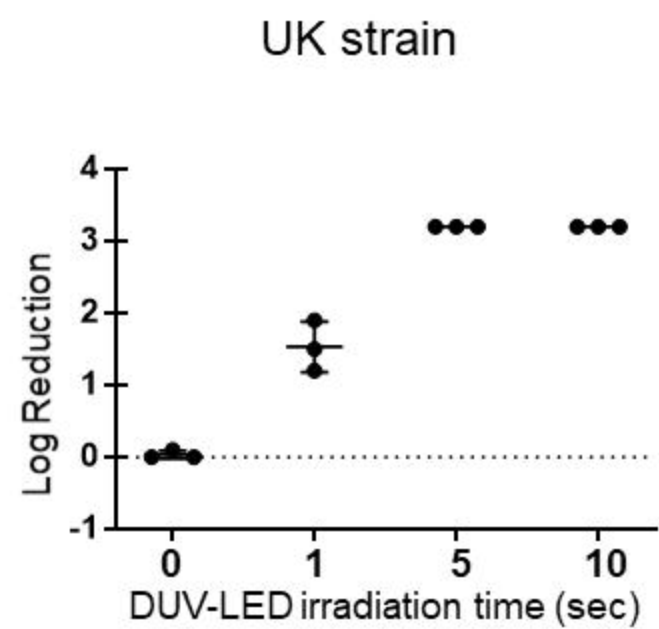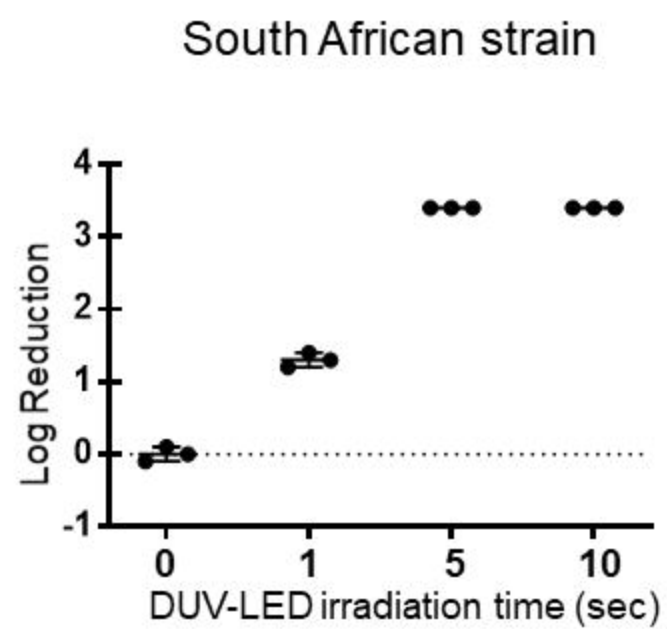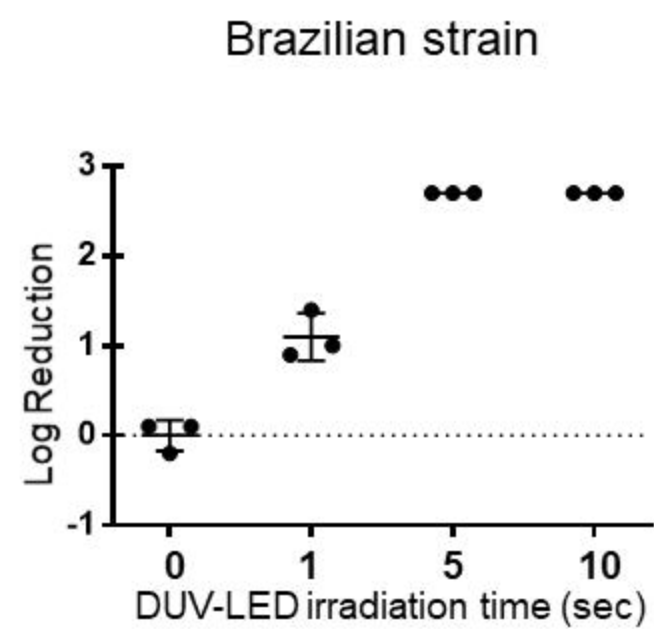

Figure 4

UK strain

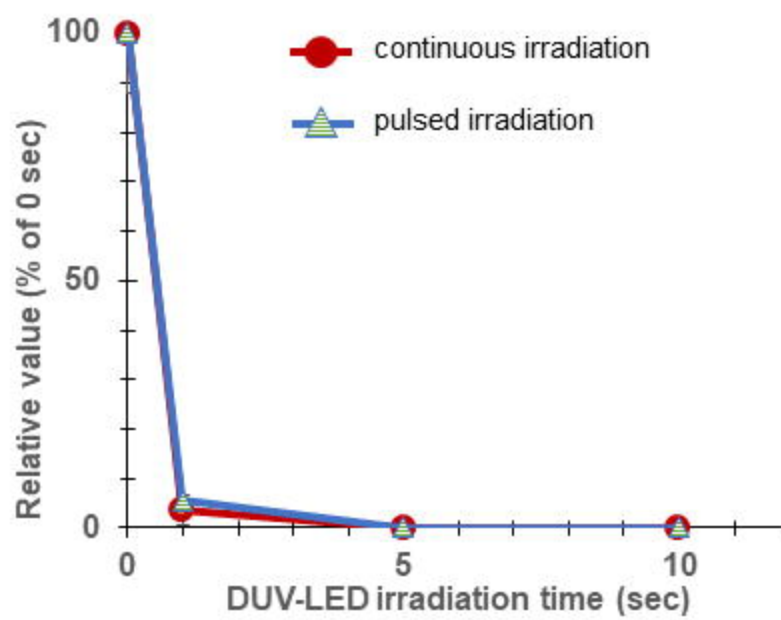

South African strain

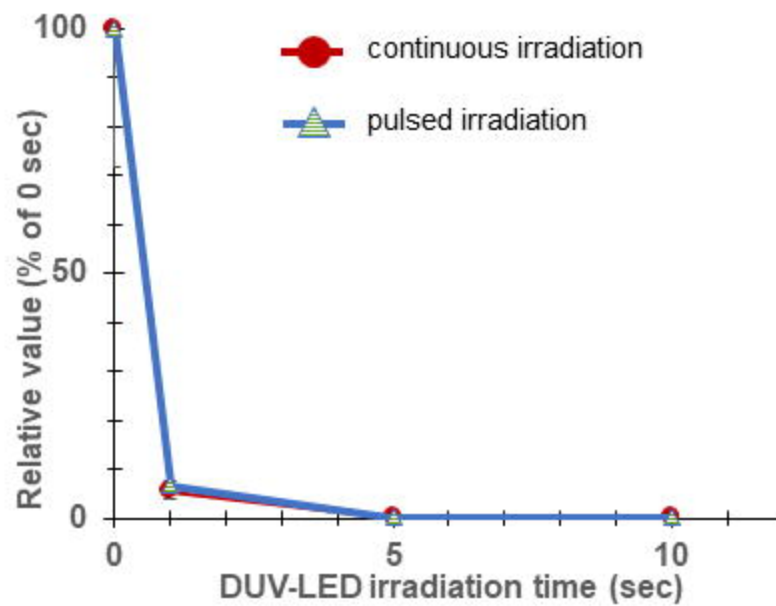

Brazilian strain

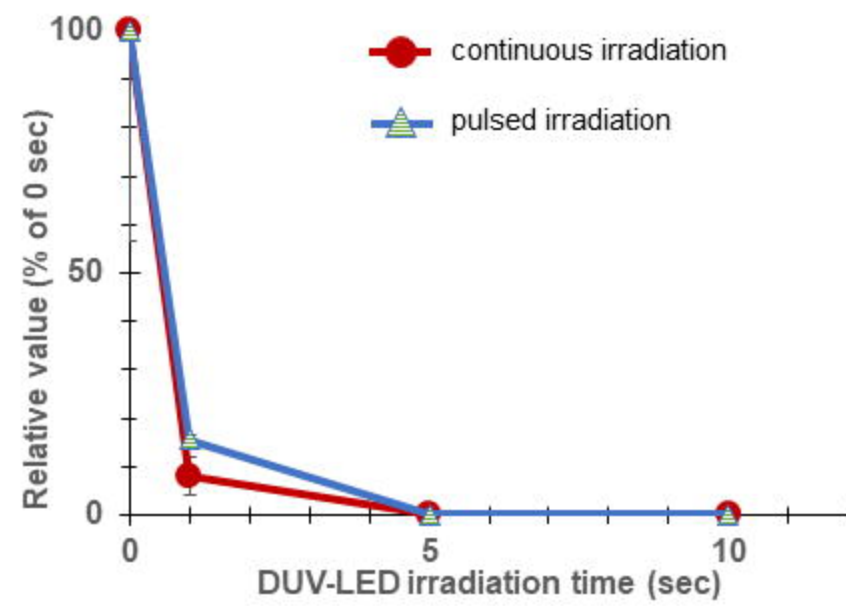

**Table 1**

|                      |                                                  | Control<br>(no irradiation) | DUV-LED irradiation time  |                       |                           |                       |                           |                       |
|----------------------|--------------------------------------------------|-----------------------------|---------------------------|-----------------------|---------------------------|-----------------------|---------------------------|-----------------------|
|                      |                                                  |                             | 1 sec                     |                       | 5 sec                     |                       | 10 sec                    |                       |
|                      |                                                  |                             | continuous<br>irradiation | pulsed<br>irradiation | continuous<br>irradiation | pulsed<br>irradiation | continuous<br>irradiation | pulsed<br>irradiation |
| UK strain            | PFU (PFU/mL)                                     | $3.5 \times 10^4$           | $1.3 \times 10^3$         | $1.9 \times 10^3$     | < 20                      | < 20                  | < 20                      | < 20                  |
|                      | Log PFU ratio <sup>a</sup>                       | —                           | 1.4                       | 1.3                   | > 3.2                     | > 3.2                 | > 3.2                     | > 3.2                 |
|                      | Infection titer reduction ratio <sup>b</sup> (%) | —                           | 96.3                      | 94.4                  | > 99.9                    | > 99.9                | > 99.9                    | > 99.9                |
| South African strain | PFU (PFU/mL)                                     | $5.3 \times 10^4$           | $2.9 \times 10^3$         | $3.5 \times 10^3$     | < 20                      | $5.3 \times 10^1$     | < 20                      | < 20                  |
|                      | Log PFU ratio <sup>a</sup>                       | —                           | 1.3                       | 1.2                   | > 3.4                     | 3.1                   | > 3.4                     | > 3.4                 |
|                      | Infection titer reduction ratio <sup>b</sup> (%) | —                           | 94.6                      | 93.4                  | > 99.9                    | 99.9                  | > 99.9                    | > 99.9                |
| Brazilian strain     | PFU (PFU/mL)                                     | $1.1 \times 10^4$           | $8.7 \times 10^2$         | $1.7 \times 10^3$     | < 20                      | < 20                  | < 20                      | < 20                  |
|                      | Log PFU ratio <sup>a</sup>                       | —                           | 1.1                       | 0.8                   | > 2.7                     | > 2.7                 | > 2.7                     | > 2.7                 |
|                      | Infection titer reduction ratio <sup>b</sup> (%) | —                           | 91.9                      | 84.4                  | > 99.8                    | > 99.8                | > 99.8                    | > 99.8                |

<sup>a</sup>  $\log_{10} (N_t/N_0)$  where  $N_t$  is the PFU count of the UV-irradiated sample and  $N_0$  is the PFU count of the sample without UV irradiation.

<sup>b</sup>  $(1 - 1/10^{\log \text{PFU ratio}}) \times 100$  (%).

# Supplement 1

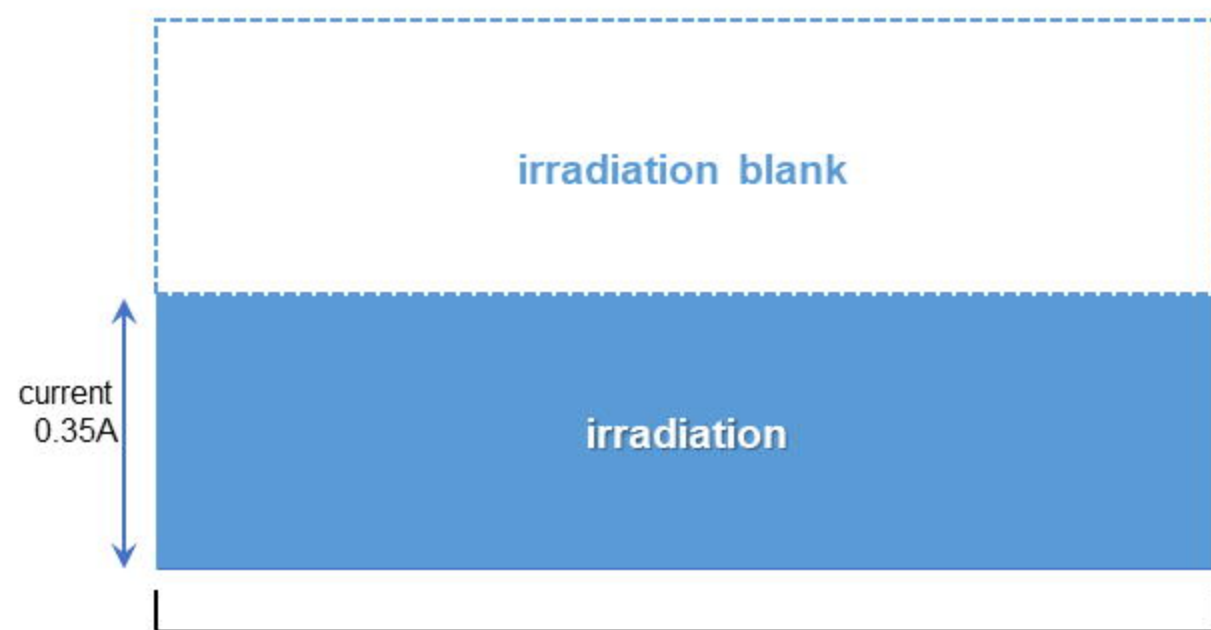

A) continuous irradiation

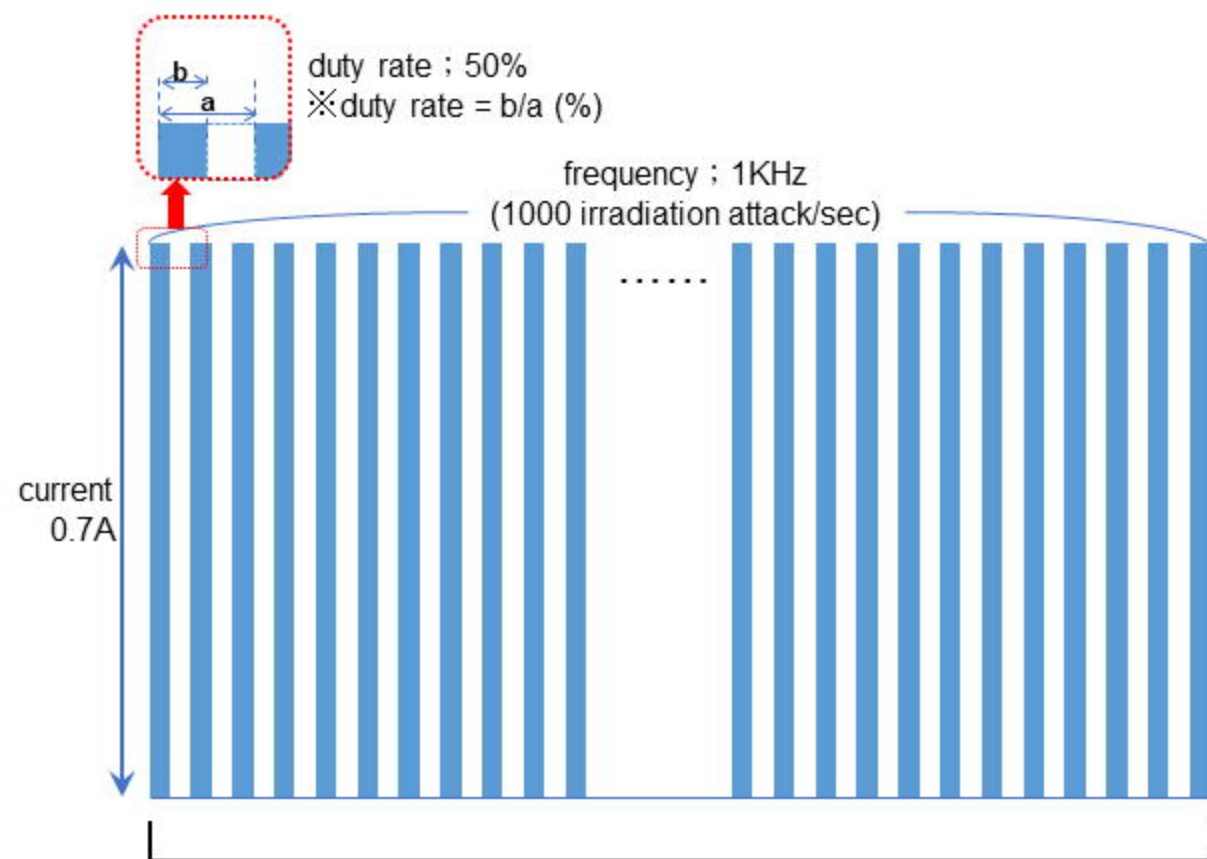

B) intermittent irradiation
